# A continuum of specialists and generalists in empirical communities

October 3, 2014

- 1 **Timothée Poisot** – [t.poisot@gmail.com](mailto:t.poisot@gmail.com)
- 2 (1) School of Biological Sciences, University of Canterbury, Private Bag 4800, Christchurch 8140, New  
3 Zealand
- 4 (2) Département de Biologie, Université du Québec à Rimouski, 300 Allée des Ursulines, Rimouski G5L  
5 3A1 QC, Canada
- 6 (3) Québec Centre for Biodiversity Sciences, Montréal QC, Canada
- 7 **Sonia Kéfi** – [sonia.kefi@univ-montp2.fr](mailto:sonia.kefi@univ-montp2.fr)
- 8 (4) Institut des Sciences de l'Évolution, Université Montpellier 2, CNRS, IRD, CC 065, Place Eugène  
9 Bataillon, 34095 Montpellier Cedex 05, France
- 10 **Serge Morand** – [serge.morand@univ-montp2.fr](mailto:serge.morand@univ-montp2.fr)
- 11 (5) CNRS-CIRAD AGIRs, Centre d'Infectiologie Christophe Mérieux du Laos, Vientiane, Lao PDR
- 12 **Michal Stanko** – [stankom@saske.sk](mailto:stankom@saske.sk)
- 13 (6) Institute of Zoology and Institute of Parasitology, Slovak Academy of Sciences, Lofflerova 10, 04001  
14 Kosice, Slovakia
- 15 **Pablo A. Marquet** – [pmarquet@bio.puc.cl](mailto:pmarquet@bio.puc.cl)
- 16 (7) Departamento de Ecología, Facultad de Ciencias Biológicas, Pontificia Universidad Católica de Chile,  
17 Santiago, Chile
- 18 (8) Instituto de Ecología y Biodiversidad, Casilla 653, Santiago, Chile
- 19 (9) Santa Fe Institute, 1399 Hyde Park Road Santa Fe, New Mexico 87501 USA
- 20 (10) Laboratorio Internacional en Cambio Global (LINCGlobal) Facultad de Ciencias Biológicas, Ponti-  
21 ficia Universidad Católica de Chile, Santiago, Chile
- 22 **Michael E. Hochberg** – [michael.hochberg@univ-montp2.fr](mailto:michael.hochberg@univ-montp2.fr)
- 23 (4) Institut des Sciences de l'Évolution, Université Montpellier 2, CNRS, IRD, CC 065, Place Eugène  
24 Bataillon, 34095 Montpellier Cedex 05, France (9) Santa Fe Institute, 1399 Hyde Park Road Santa Fe,  
25 New Mexico 87501 USA
- 26 (11) Wissenschaftskolleg zu Berlin, 14193 Berlin, Germany

1 Understanding the persistence of specialists and generalists within ecological communities is a topical  
2 research question, with far-reaching consequences for the maintenance of functional diversity. Although  
3 theoretical studies indicate that restricted conditions may be necessary to achieve co-occurrence of spe-  
4 cialists and generalists, analyses of larger empirical (and species-rich) communities reveal the perva-  
5 siveness of coexistence. In this paper, we analyze 175 ecological bipartite networks of three interaction  
6 types (animal hosts-parasite, plant-herbivore and plant-pollinator), and measure the extent to which these  
7 communities are composed of species with different levels of specificity in their biotic interactions. We  
8 find a continuum from specialism to generalism. Furthermore, we demonstrate that diversity tends to be  
9 greatest in networks with intermediate connectance, and argue this is because of physical constraints in  
10 the filling of networks.

11 **Keywords:** bipartite networks; specificity; nestedness; modularity; food webs; parasites; pollinators;  
12 herbivores

## 1 **Introduction**

2 The functional diversity of ecological communities emerges through the simultaneous occurrence of  
3 species with contrasted resource use [1], habitat selection [2], and interactions [3,4]. Both empirical and  
4 theoretical studies have shown how different degrees of niche partitioning can promote functional diver-  
5 sity [5–7] and species persistence [8]. However, the co-occurrence of specialist and generalist species  
6 has received considerably less attention. The majority of studies seeking to understand the conditions  
7 for co-occurrence between populations of specialists and generalists in both biotic (*e.g.* predator–prey,  
8 host–parasite) and abiotic (*e.g.* habitat choice) interactions have focused on small communities [9–14].

9 Approaches based on model analysis or controlled experiments have two features impeding their gener-  
10 alization to large communities. First, the number of interacting organisms is often kept low, to facilitate  
11 model analysis or because of experimental constraints. Studies investigating the co-occurrence of species  
12 with contrasted specificities assume no intermediate situations between the endpoints of specialism and  
13 generalism, whereas natural systems exhibit a continuum [15,16]. Second, it is unclear to what extent  
14 results can be scaled up to more realistic communities. Stouffer and colleagues [17] showed that because  
15 adding species and interactions increases the potential for complex population dynamical feedbacks,  
16 complete, realistic networks tend to exhibit different behaviors than simple modules (*i.e.* those typically  
17 used in models or experiments), begging for an analysis of co-occurrence in empirical communities.

18 Network theory offers powerful tools to describe ecological communities [18] and the distribution of  
19 species specificity within them [19]. In a species interaction network, each species is a node, and each in-  
20 teraction is an edge, connecting a pair of nodes. From a network perspective, one can measure specificity  
21 by counting the number of links it has with other species (its degree), or by measuring aspects of the  
22 distribution of the strengths of such links [19]. Previous work described the degree distribution (*i.e.* the  
23 distribution of how many interactions each species establishes and receives) of empirical networks, and  
24 revealed a continuum from highly specialized to generalists species [20]. While much is known about the  
25 factors (*e.g.* biotic [21], abiotic [14,15], developmental and physiological [22]) driving the specialization  
26 of single species, less is known about the spectrum of specificities and niche-overlaps that can co-occur  
27 in large ecological networks, and reasons for different spectra. As the co-occurrence and interactions

1 between specialized and generalized species is key to maintaining functional diversity [23], promoting  
 2 community stability [24], and ensuring network persistence [3], there is a need to investigate the extent  
 3 and properties of this co-occurrence.

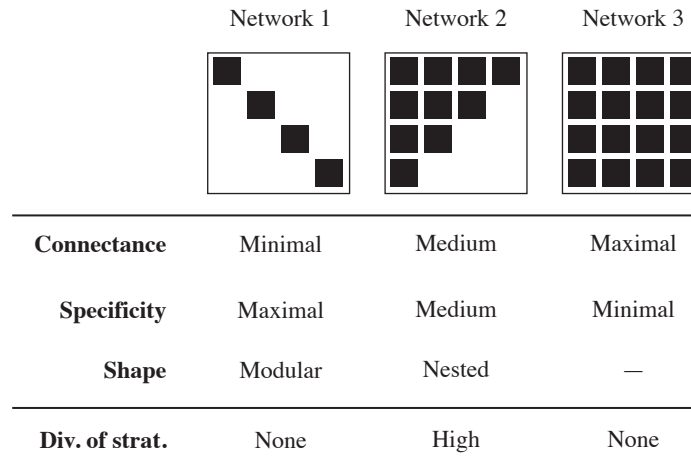

Figure 1: Expected relationships between connectance and other metrics.

4 In a previous paper [1], we argued that the specialisation of different types of interactions is likely to be  
 5 shaped by the same set of core mechanisms, expressed in a different ways or with different intensities.  
 6 At the community level, this leads to the expectation that the same relationships between specificity, the  
 7 co-occurrence of specialists and generalists, and other metrics of community structure would occur for  
 8 different types of ecological interactions, despite different types of networks, dominated by positive or  
 9 negative interactions, occupying different parts of this gradient [25]. In this study, we use a dataset of  
 10 interaction networks spanning three contrasted types of ecological interactions (herbivory, parasitism, and  
 11 mutualism), to characterize the extent to which species with different specificities can co-occur within  
 12 the same community. In line with our expectation and past empirical data, we find a continuum from  
 13 networks of mostly-specialized to mostly-generalized species, with the potential for specialist/generalist  
 14 co-occurrence being greater at intermediate connectance. One central result is that empirical data show  
 15 consistently more variation in specificities of all species on the upper network level (parasites, herbivores,  
 16 pollinators; hereafter called “strategy diversity”) than predicted by two contrasting null models. This  
 17 suggests (i) that organisms with very different levels of specificity can co-occur in most natural systems,

- 1 and (ii) that ecological or evolutionary mechanisms are acting to maintain high diversity in the range of
- 2 specificities.

## 1 **Methods**

### 2 **Datasets**

3 We employ three datasets: two for antagonistic (ectoparasite–animal host and insect herbivore–plant) in-  
4 teractions, and one for mutualistic (pollinator–plant) interactions. Parasitism networks were from Stanko  
5 and colleagues [26,27] and consist of 121 networks of ectoparasites infecting rodents in Central Eu-  
6 rope, collected in a range of continental ecosystems over a period of 19 years. Herbivory networks (a  
7 total of 23) were collected by Thébault and Fontaine [25] from various literature records. Data on mu-  
8 tualistic interactions are the 29 “plant–pollinators” networks deposited in the *InteractionWeb* database  
9 (<http://www.nceas.ucsb.edu/interactionweb/>) as of May 2012. These data are insect–plant con-  
10 tacts, aggregated from different sources, spanning a period of over 30 years. Species with no interaction  
11 were removed from the original datasets. Some networks had less than 1000 possible randomizations,  
12 which did not allow for efficient or meaningful randomisation [28], and as such were discarded from the  
13 analysis. The final dataset has 115 parasitism networks, 6 herbivory networks, and 12 pollination net-  
14 works. Because the sample size is unbalanced, we put particular emphasis on the discussion of parasitism  
15 networks.

### 16 **Network analyses**

17 Each bipartite network is represented by its adjacency matrix  $\mathbf{M}$  with  $T$  rows (for the upper level, *i.e.*  
18 ectoparasites, herbivores, and pollinators) and  $L$  columns (for the lower level, *i.e.* animal hosts and plants  
19 being consumed or pollinated). In each network,  $\mathbf{M}_{ij}$  represents the existence of an interaction between  
20 species  $i$  and species  $j$  [29]. For each network, we calculate its size ( $Z = L \times T$ ), and connectance ( $C_o$ ,  
21 the proportion of established interactions). We focus our analyses on the upper level, since we have  
22 more knowledge of specialization mechanisms for these organisms [30]. Nestedness, a measure that  
23 reflects whether specialist species interact with the same species as generalists, is calculated using the  
24 NODF (Nestedness based on Overlap and Decreasing Fill) measure [31]. NODF is insensitive to net-  
25 work asymmetry (the relative number of species at each of the two levels) and size. Modularity measures

1 the extent to which species form well defined, densely connected, groups, with few connections between  
2 groups. Modularity is estimated using the LP-BRIM method [32], which both increases detection com-  
3 pared to the adaptive BRIM method, and is less computationally intensive [33]. For each network, we  
4 retained the highest modularity  $Q_{bip}$  [34] observed in a total of 1000 replicate runs.

5 We contrast empirical observations with the predictions of two different null models, each based on the  
6 impact of different aspects of network structure. For each null model, we filled a network through a  
7 Bernoulli process, in which the probability of each pairwise species interaction occurring ( $P_{ij}$ ) is deter-  
8 mined in one of the following ways. Null model I [35] is connectance based and assigns the same prob-  
9 ability to each interaction,  $P_{ij} = Co$ . Compared to the empirical network on which they are based, simu-  
10 lated networks can have the same connectance, but a potentially different degree distribution. Null model  
11 II [3] uses information about species degree (the number of interactions established/received) to calculate  
12 the probability that a particular interaction will occur. This probability is  $P_{ij} = (T \times G_i + L \times V_j) / (2 \times Z)$ ,  
13 where  $G_i$  and  $V_j$  are, respectively, the generality (number of interactions) of upper level species  $i$ , and the  
14 vulnerability (number of interactions) of lower level species  $j$  [36]. Simply put, the probability of the  
15 interaction occurring is the mean of the degrees (ranged in 0–1) of the two species involved. Note that  
16 the first null model is nested into the second.

17 Each of these models was applied to each network in the dataset, so as to generate 1000 random networks  
18 (meaning that each empirical network was fed into the model to generate a total of 2000 randomizations).  
19 Each of these networks was analyzed using the same methods as for empirical networks.

## 20 **Quantifying specificity**

21 We quantify specificity based on the proportion of available species with which a focal species interacts  
22 [37], using a ranged version of Schoener’s generality. For each species  $i$  of the upper level (*e.g.* parasites),  
23 its specificity is given by

$$24 \mathbf{s}_i = \frac{L - l_i}{L - 1}$$

25 where  $L$  is the number of lower level species (*e.g.* hosts) found in the network, and  $l_i$  is the number of  
26 interaction partners of species  $i$ . The vector  $\mathbf{s}$  is the distribution of specificities at the network scale .



1 Values of 1 indicate complete specialism (single partner), and values of 0 indicate complete generalism  
2 (all possible partners).

### 3 **Quantifying strategy diversity**

4 We quantify two aspects of the co-occurrence of specialists and generalists (*i.e.* “strategy diversity”).  
5 First, “specificity range” or  $R$ , is simply the difference between the specificity of the most and least  
6 specialized organisms, such that

$$7 \quad R = \max(\mathbf{s}) - \min(\mathbf{s})$$

8  $R$  is maximized when at least one completely specialized species  $k$  ( $\mathbf{s}_k = 1$ ) is found in the same network  
9 as one (or more) completely generalized species  $l$  ( $\mathbf{s}_l = 0$ ).

10 A second measure of the distribution of specificities within a network is its evenness, denoted  $E$ . We  
11 define  $\mathbf{s}'$  as all the unique values of  $\mathbf{s}$ , rounded to the second decimal place. We define  $U$  as the ordered  
12 set of  $\mathbf{s}'$  values and  $u$  as each of the elements of this set. Thus  $p(u)$  is the probability associated to a  
13 given element of  $U$ . For example, if  $\mathbf{s}' = [0.1, 1, 1, 0, 0.4]$ , then  $U = [0, 0.1, 0.4, 1]$ ,  $p(u = 1) = 2/5$ , and  
14  $p(u = 0) = 1/5$ . With this information, we calculate the self-information [38] of  $u$  as  $I(u) = -\ln(u)$ , and  
15 based on these two sets of values, we calculate the Shannon’s entropy of the distribution of specificity  
16 values as

$$17 \quad H = \sum_{u \in U} [p(u)I(u)]$$

18 If  $U$  takes on  $N$  possible values, then the theoretical maximum of  $H$  (attained when all values of  $\mathbf{s}'$  are  
19 unique, *i.e.* no two species are equally specialised) is

$$20 \quad H_{\max} = \ln(N)$$

21 To eliminate any scaling effect that might occur due to different network sizes, we take the exponentials  
22 of these values [39], such that the standardized value of  $E$  is

$$23 \quad E = e^{H-H_{\max}}$$

24 It follows that  $E = 1$  when no two organisms have the same level of specificity, and  $E = 0$  when all values  
25 of  $\mathbf{s}'$  are equal. Note that rounding to the second decimal place allows accounting for the fact that some

1 organisms may have very similar (but not exactly equal) specificities. Small differences in the values  
2 of specificity are less important than the potential amplitude of measurement error, as preliminary tests  
3 indicated that the rounding of  $s'$  does not qualitatively change observed relationships. It is also known  
4 that small differences in link strength have little or no impact in larger networks [40].

5 Finally, we present a simple summary statistic that we call “strategy diversity” ( $D$ ),

$$6 \quad D = \frac{1}{2}(E + R)$$

7 which given that both  $E$  and  $R$  take values in  $[0, 1]$ , will also return values in this range.  $D = 1$  indicates  
8 that the specificity values found in a network range from highly specialized to highly generalized *and*  
9 are evenly distributed.  $D = 0$  means that a network is composed entirely of species sharing the same  
10 specificity values. The two advantages of  $D$  are (i) it accounts both for the range of specificities and their  
11 distribution, and (ii) it is independent of the observed specificity values. We expect strategy diversity ( $D$ )  
12 to peak at intermediate values of connectance and specificity, to increase with nestedness, and to decrease  
13 with modularity (Fig. 1). The reasoning is as follows. Interaction matrices are physically constrained  
14 objects, in that adding interactions will modify their properties, and thus produce artifacts [28,41]. By  
15 definition, a perfectly nested network maximizes strategy diversity [31], and a modular network tends  
16 to minimize it. A matrix with minimal fill for a given size has all interactions on the diagonal, and  
17 is therefore highly specialized, with no strategy diversity. Conversely, a completely filled network is  
18 extremely generalized, and thus has no strategy diversity.

## 1 Results

2 All types of network tend to have more strategy diversity and to be composed of more specialized species  
3 than expected by chance (Table 1). For each empirical network, we measure whether its structural prop-  
4 erties (strategy diversity, nestedness, modularity) are higher or lower than expected by chance using the  
5 two null models. Our results are reported in Table 1. Both null models gave consistent results regarding  
6 whether the empirical networks represented a deviation from random expectations. Host-parasite net-  
7 works are on average less modular than expected, herbivory networks are more, and there is no clear  
8 trend in pollination networks. There is a marked tendency towards higher than expected nestedness in all  
9 types of interactions.

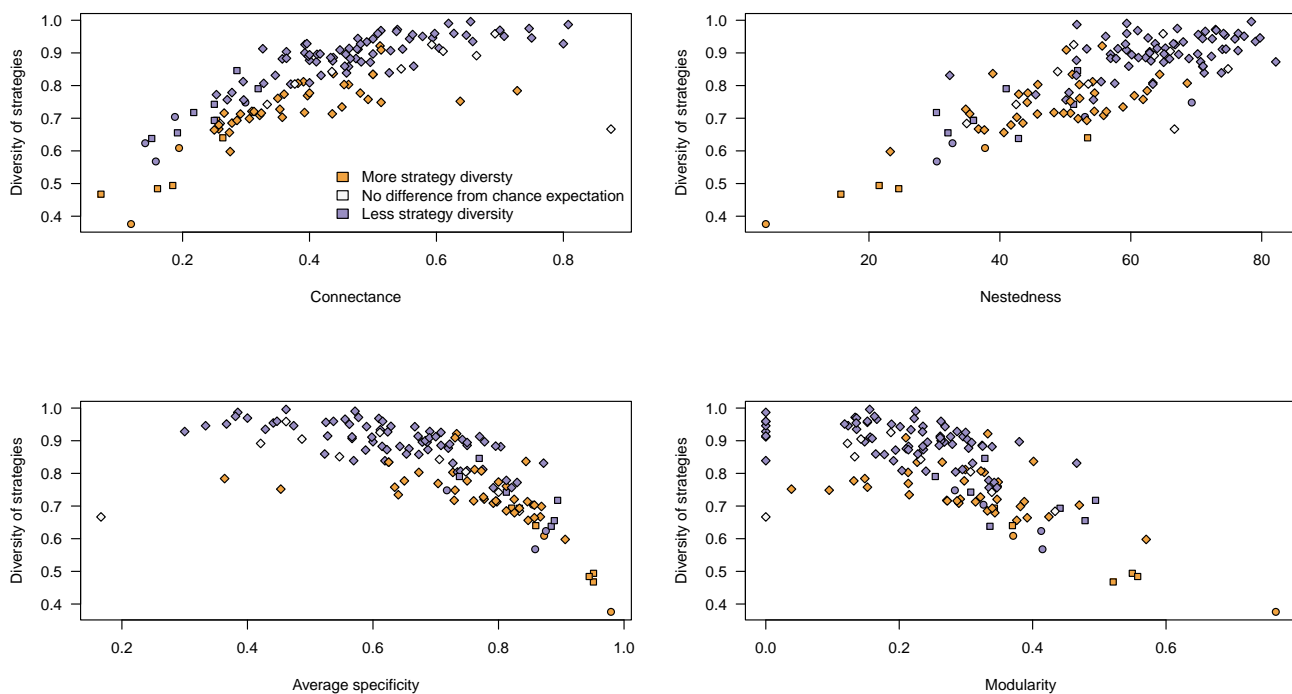

Figure 2: Values of average specificity, nestedness, connectance, and modularity for networks with more (orange) or less (purple) strategy diversity than expected by chance. The results within a type of interaction are all highly consistent. For this analysis *only*, networks that were as functionally diverse as expected (as determined by the Null Models) were removed, since their strategy diversity can be explained solely by either their connectance or degree distribution. Types of interaction are given on the x axis, with networks separated as a function of whether they have more (orange) or less (purple) strategy diversity than expected by chance (under the assumptions of the second, more restrictive null model).

10 Figure 2 presents the distributions of specificity, connectance, nestedness, and modularity in networks

1 that are either more or less functionally diverse than expected under the assumptions of null model II  
2 (using the outcomes of model I yields the same qualitative results; see Table 1). Regardless of the baseline  
3 differences between types of network for each of the metrics considered, higher diversity responded in a  
4 consistent way to variation in the other metrics. Networks with higher average specificity tended to have  
5 lower average strategy diversity, higher connectance, higher nestedness, and lower modularity (Table 2).  
6 There are significant interactions between all of the variables and the network having higher strategy  
7 diversity than expected by chance, with the exception of modularity (Table 3). These four metrics alone  
8 account for 96% of the variance of strategy diversity, and 63% of the variance in the deviation of this  
9 same metric. All metrics except modularity had a significant impact on strategy diversity. Interestingly,  
10 connectance was the best predictor of strategy diversity, whereas nestedness was the best predictor of  
11 the extent to which strategy diversity in the empirical networks deviates from random expectations. This  
12 is because by definition, null model testing removes most of the effects of connectance. The type of  
13 ecological interaction was not significant; detecting possible significance would have probably required  
14 a larger sample size for non-parasitic networks.

15 We finally examine the relationships between network metrics and strategy diversity (Fig. 3). Strategy  
16 diversity increases with connectance (it is expected to be 0 for a connectance of 1, but no network in our  
17 dataset is densely connected), decreases with average specificity (as before, strategy diversity is 0 if mean  
18 specificity is 0), increases linearly with nestedness, and decreases with modularity. An interesting result  
19 in this analysis is that the trend is the same for all three types of interaction considered, with the exception  
20 that herbivory and pollination networks tended to occupy the “low connectance” end of the gradient; they  
21 behave in the same way as do parasitism networks, reinforcing the idea that structural constraints such as  
22 that introduced by connectance may be driving emergent network properties [28,42].

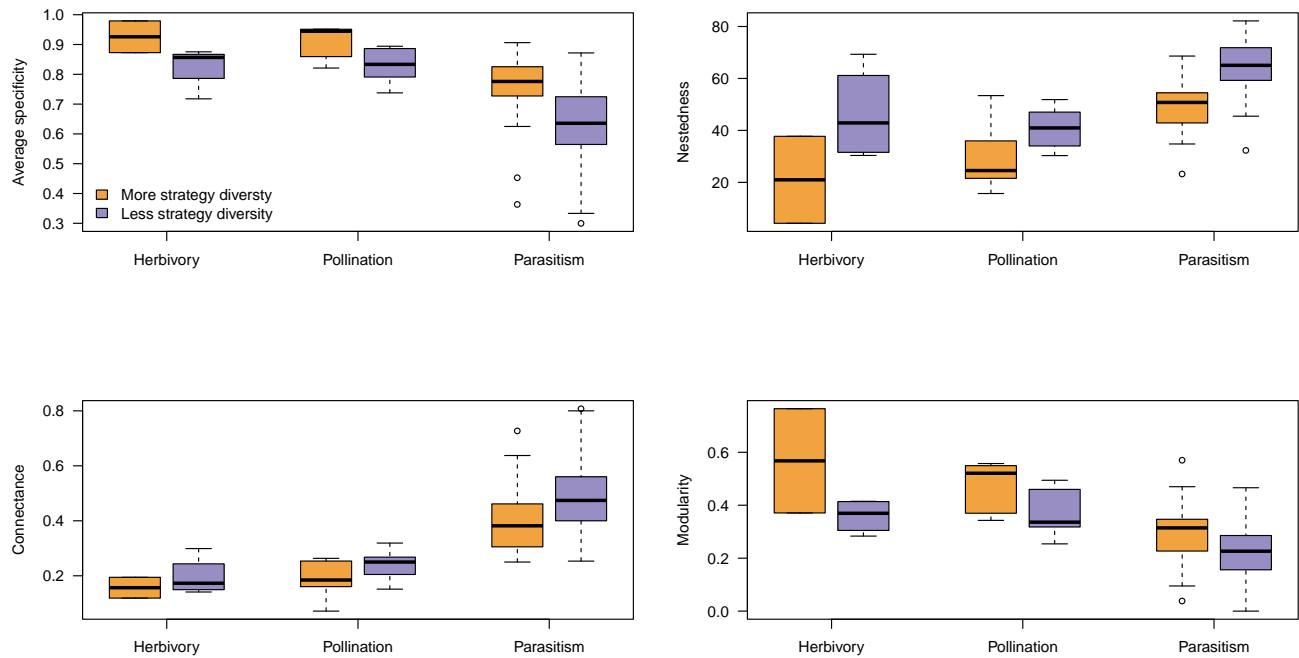

Figure 3: Scatterplot of strategy diversity versus other network metrics. Regardless of the interaction type, strategy diversity responds in a similar way to other network metrics. Points are colored as in Figure 2. Triangles are host-parasite systems, squares are plants-herbivores, and circles are plants-pollinators. Empty triangles are host-parasite networks that have as many strategy diversity as expected.

## 1 **Discussion**

2 Several mechanisms have been proposed to explain the co-occurrence of potentially competing species,  
3 including behavior [43], spatial or temporal heterogeneity [9], and trade-offs associated with species in-  
4 teractions [1,12,44]. Ecological factors such as environmental and spatial heterogeneity and evolutionary  
5 processes such as niche partitioning may permit the coexistence between competing species with similar  
6 and/or different number of resources [45,46]. However, most of these results were obtained in systems of  
7 low complexity, and the extent to which specialists and generalists co-occur in natural communities re-  
8 mains to be evaluated. By analyzing three bipartite network datasets covering a range of both ecological  
9 and structural situations, we show how co-occurrence can be linked with other topological network prop-  
10 erties. This calls for a better integration of network methodology to the analysis of community structure,  
11 with the aim of understanding the co-occurrence of species with different specificities.

12 Most emergent network properties could be predicted based on connectance alone [28]. This included,  
13 notably, components of the degree distribution (how many interactions are established/received by each  
14 species) involved in determining nestedness. The fact that the relationship between connectance, emer-  
15 gent metrics (such as nestedness and modularity), and strategy diversity is conserved across types of  
16 ecological interactions can be explained in part by these physical constraints. The fact that some inter-  
17 actions appear more or less specialised reflects average differences in connectance in these communities.  
18 Null models analysis nonetheless reveals that, for all types of interaction, approximately two-thirds of  
19 all networks had *more* strategy diversity than expected by chance; this suggests that despite physical  
20 constraints, ecological and/or evolutionary mechanisms are involved in promoting high diversity [8,47].

21 Overall, we report that networks with higher nestedness and lower modularity, also had more strategy  
22 diversity than expected under the assumptions of the two null models. If the main difference between  
23 interaction types is their connectance, then the different mechanisms involved must be studied alongside  
24 their impacts on network structure. Species specialization is regulated by differences in life-history traits  
25 [1], competition for access to resources [45,48], or phylogenetic conservatism in attack/defense strategies  
26 [49]. Through their impact on species range of resources used, these factors are likely to be involved in  
27 driving network structure, and connectance in particular. For example, in herbivorous systems, plants

1 may employ multiple defenses against enemies, including the release of toxic compounds [50] and/or  
2 attraction of a herbivore's natural enemies [51–54]. The simultaneous existence of different levels of  
3 defense such as those mentioned above may promote lower connectance. It can also result in the faster  
4 diversification of exploitation strategies at the upper level (in the sense that enemies specialize on a  
5 *defense mechanism* rather than on the set of defended species) than in other types of interaction rely on  
6 narrower sets of mechanisms [15]. This may result in the maintenance of high strategy diversity relative  
7 to connectance in some antagonistic interactions.

8 In summary, although the ecological nature of an interaction (mutualistic or antagonistic) has an impact  
9 on network structure, higher than expected strategy diversity appears to be a conserved property in bipar-  
10 tite ecological networks. The particular position occupied by a network along a continuum of, *e.g.* con-  
11 nectance or nestedness, can emerge because of the life-history traits of species establishing interactions,  
12 and we suggest that increased attention should be given to understanding how fine-scale mechanisms at  
13 the individual or population level drive the structure of community-level networks. It is nonetheless clear  
14 that despite theoretical predictions, generalists and specialists are often found together in nature. Under-  
15 standing this gap between predictions and observations will be a major challenge that should be addressed  
16 by investigating the mechanisms of coexistence and co-occurrence in large multi-species communities.

17 **Acknowledgments:** We thank E. Canard, V. Devictor, I. Gounand, S. Fellous & N. Mouquet for com-  
18 ments, and the Canadian Research Chair on Continental Ecosystems Ecology for providing computa-  
19 tional support. We thank É. Thébault and C. Fontaine for sharing data for plants and herbivores sys-  
20 tems. The bipy package used for the analyses, and the C99 program used for the generation of ran-  
21 dom networks under the three null models are available at <http://github.com/tpoisot/bipy> and  
22 <http://github.com/tpoisot/CNullModels>. MS was funded by Slovak Research and Development  
23 Agency grant No. 0267-10. TP was support by a CRD grant from NSERC, and a PBEEE post-doctoral  
24 scholarship from FQRNT/MELS. MEH is funded by grants from Agence Nationale de la Recherche  
25 'EvolStress' (ANR-09-BLAN-099-01), the CNRS (PICS06313) and the McDonnell Foundation (JSMF  
26 220020294/SCS-Research Award).

## 1 **Tables**

2 **Table 1.** Results of the null models analyses. For each network metric, and for each null model, we in-  
3 dicate the proportion of networks that had significantly larger or smaller values than expected by chance.  
4 A network has a significantly different value from the prediction when the empirical value falls outside  
5 of the 95% confidence interval for the value as measured on randomized networks [55]. NS: no significant  
6 difference in strategy diversity. *D*: strategy diversity. *S*: average specificity.

7 **Table 2.** Analysis of the results presented in Fig. 2. We used a two-sample t-test to determine differences  
8 from chance expectations for networks with either less, equal, or more strategy diversity. We observe that  
9 all metrics are different from chance expectatons for parasitism networks, but not for other interaction  
10 types (although our failure to report an effect is most likely due to the small sample size, as indicated by  
11 certain large confidence intervals).

12 **Table 3.** Analysis of variance partitioning (ANOVA on linear additive models) of the effects of con-  
13 nectance, nestedness, mean specificity, and modularity, on strategy diversity, and the excess strategy  
14 diversity (deviation of empirical values from simulated networks as assessed by the Null Model analy-  
15 sis). Preliminary analyses showed no impact of the interaction type on these relationships, so this factor  
16 was not included as a covariate. *D*: strategy diversity.



## 1 **References**

- 2 1. Poisot T, Bever JD, Nemri A, Thrall PH, Hochberg ME (2011) A conceptual framework for the  
3 evolution of ecological specialisation. *Ecol Lett* 14: 841–851.
- 4 2. Devictor V, Julliard R, Clavel J, Jiguet F, Lee A, et al. (2008) Functional biotic homogenization of  
5 bird communities in disturbed landscapes. *Glob Ecol Biogeogr* 17: 252–261.
- 6 3. Bascompte J, Jordano P, Melián CJ, Olesen JM (2003) The nested assembly of plant–animal mutual-  
7 istic networks. *Proc Natl Acad Sci U S A* 100: 9383–9387.
- 8 4. Weiner J, Xiao S (2012) Variation in the degree of specialization can maintain local diversity in model  
9 communities. *Theor Ecol* 5: 161–166.
- 10 5. Diaz S, Cabido M (2001) Vive la différence: plant functional diversity matters to ecosystem processes.  
11 *Trends Ecol Evol* 16: 646–655.
- 12 6. Petchey OL, Gaston KJ (2002) Functional diversity (FD), species richness and community composi-  
13 tion. *Ecol Lett* 5: 402–411.
- 14 7. Ackerly DD, Cornwell WK (2007) A trait-based approach to community assembly: partitioning of  
15 species trait values into within- and among-community components. *Ecol Lett* 10: 135–145.
- 16 8. Bastolla U, Fortuna MA, Pascual-García A, Ferrera A, Luque B, et al. (2009) The architecture of  
17 mutualistic networks minimizes competition and increases biodiversity. *Nature* 458: 1018–1020.
- 18 9. Wilson DS, Yoshimura J (1994) On the coexistence of specialists and generalists. *Am Nat* 144:  
19 692–707.
- 20 10. Hochberg ME, Holt RD (1990) The coexistence of competing parasites. I. The role of cross-species  
21 infection. *Am Nat* 136: 517–541.
- 22 11. De Meeûs T, Hochberg ME, Renaud F (1995) Maintenance of two genetic entities by habitat selec-  
23 tion. *Evol Ecol* 9: 131–138.
- 24 12. Egas M, Dieckmann U, Sabelis MW (2004) Evolution restricts the coexistence of specialists and  
25 generalists: the role of trade-off structure. *Am Nat* 163: 518–531.

- 1 13. Abrams PA (2006) The prerequisites for and likelihood of generalist-specialist coexistence. *Am Nat*  
2 167: 329–342.
- 3 14. Ravné V, Dieckmann U, Olivieri I (2009) Live where you thrive: Joint evolution of habitat choice  
4 and local adaptation facilitates specialization and promotes diversity. *Am Nat* 174: 141–169.
- 5 15. Forister ML, Dyer LA, Singer MS, Stireman III JO, Lill JT (2012) Revisiting the evolution of  
6 ecological specialization, with emphasis on insect–plant interactions. *Ecology* 93: 981–991.
- 7 16. Poisot T, Lounnas M, Hochberg ME (2013) The structure of natural microbial enemy-victim net-  
8 works. *Ecol Process*.
- 9 17. Stouffer DB, Bascompte J (2009) Understanding food-web persistence from local to global scales.  
10 *Ecol Lett* 13: 154–161.
- 11 18. Proulx S, Promislow D, Phillips P (2005) Network thinking in ecology and evolution. *Trends Ecol*  
12 *Evol* 20: 345–353.
- 13 19. Poisot T, Canard E, Mouquet N, Hochberg ME (2012) A comparative study of ecological specializa-  
14 tion estimators. *Methods Ecol Evol* 3: 537–544.
- 15 20. Otto SB, Rall BC, Brose U (2007) Allometric degree distributions facilitate food-web stability.  
16 *Nature* 450: 1226–1229.
- 17 21. Thrall PH, Hochberg ME, Burdon JJ, Bever JD (2007) Coevolution of symbiotic mutualists and  
18 parasites in a community context. *Trends Ecol Evol* 22: 120–126.
- 19 22. Ferry-Graham LA, Bolnick DI, Wainwright PC (2002) Using functional morphology to examine the  
20 ecology and evolution of specialization. *Integr Comp Biol* 42: 265–277.
- 21 23. Devictor V, Clavel J, Julliard R, Lavergne S, Mouillot D, et al. (2010) Defining and measuring  
22 ecological specialization. *J Appl Ecol* 47: 15–25.
- 23 24. Hassell M, May R (1986) Generalist and specialist natural enemies in insect predator-prey interac-  
24 tions. *J Anim Ecol* 55: 923–940.
- 25 25. Thebault E, Fontaine C (2010) Stability of ecological communities and the architecture of mutualistic  
26 and trophic networks. *Science* 329: 853–856.

- 1 26. Stanko M, Miklisová D, Bellocq J Goüy de, Morand S (2002) Mammal density and patterns of  
2 ectoparasite species richness and abundance. *Oecologia* 131: 289–295.
- 3 27. Data from: Empirical evaluation of neutral interactions in host-parasite networks (2014).
- 4 28. Poisot T, Gravel D (2014) When is an ecological network complex? Connectance drives degree  
5 distribution and emerging network properties. *PeerJ* 2: e251.
- 6 29. Dunne JA (2006) The Network Structure of Food Webs. In: Dunne JA, Pascual M, editors. *Ecological*  
7 *networks: Linking structure and dynamics*. Oxford University Press. pp. 27–86.
- 8 30. Futuyama DJ, Moreno G (1988) The evolution of ecological specialization. *Annu Rev Ecol Syst* 19:  
9 207–233.
- 10 31. Almeida-Neto M, Guimaraes P, Guimaraes Jr P, Loyola R, Ulrich W (2008) A consistent metric  
11 for nestedness analysis in ecological systems: reconciling concept and measurement. *Oikos* 117: 1227–  
12 1239.
- 13 32. Liu X, Murata T (2010) Community detection in large-scale bipartite networks. In: *Transactions of*  
14 *the Japanese Society for Artificial Intelligence*. Vol. 5. pp. 184–192.
- 15 33. Barber M, Clark J (2009) Detecting network communities by propagating labels under constraints.  
16 *Phys Rev E* 80: 1–11.
- 17 34. Barber M (2007) Modularity and community detection in bipartite networks. *Phys Rev E* 76.
- 18 35. Fortuna MA, Bascompte J (2006) Habitat loss and the structure of plant-animal mutualistic networks.  
19 *Ecol Lett* 9: 281–286.
- 20 36. Schoener TW (1989) Food webs from the small to the large. *Ecology* 70: 1559–1589.
- 21 37. Poisot T, Canard E, Mouillot D, Mouquet N, Gravel D (2012) The dissimilarity of species interaction  
22 networks. *Ecol Lett* 15: 1353–1361.
- 23 38. Shannon CE (1948) A mathematical theory of communication. *Bell Syst Tech J* 27: 379–423.
- 24 39. Bersier LF, Banalvsek-Richter C, Cattin MF (2002) Quantitative descriptors of food-web matrices.  
25 *Ecology* 83: 2394–2407.

- 1 40. Berlow EL, Neutel A-M, Cohen JE, Ruiters PC de, Ebenman B, et al. (2004) Interaction strengths in  
2 food webs: issues and opportunities. *J Anim Ecol* 73: 585–598.
- 3 41. Miklos I, Podani J (2004) Randomization of Presence-Absence Matrices: Comments and New Algo-  
4 rithms. *Ecology* 85: 86–92.
- 5 42. Williams RJ (2011) Biology, Methodology or Chance? The Degree Distributions of Bipartite Eco-  
6 logical Networks. *PLoS One* 6: e17645.
- 7 43. Abrams PA (2006) The effects of switching behavior on the evolutionary diversification of generalist  
8 consumers. *Am Nat* 168: 645–659.
- 9 44. McPeck MA (1996) Trade-offs, food web structure, and the coexistence of habitat specialists and  
10 generalists. *Am Nat* 148: 124–138.
- 11 45. Bascompte J, Jordano P, Olesen JM (2006) Asymmetric coevolutionary networks facilitate biodiver-  
12 sity maintenance. *Science* 312: 431–433.
- 13 46. Poullain V, Gandon S, Brockhurst MA, Buckling A, Hochberg ME (2008) The evolution of specificity  
14 in evolving and coevolving antagonistic interactions between a bacteria and its phage. *Evolution* 62: 1–  
15 11.
- 16 47. Haerter JO, Mitarai N, Sneppen K (2014) Phage and bacteria support mutual diversity in a narrowing  
17 staircase of coexistence. *ISME J*.
- 18 48. Bascompte J, Jordano P (2007) Plant-Animal Mutualistic Networks: the Architecture of Biodiversity.  
19 *Annu Rev Ecol Evol Syst* 38: 567–593.
- 20 49. Cavender-Bares J, Kozak KH, Fine PVA, Kembel SW (2009) The merging of community ecology  
21 and phylogenetic biology. *Ecol Lett* 12: 693–715.
- 22 50. Arimura G-i, Kost C, Boland W (2005) Herbivore-induced, indirect plant defences. *Biochim Biophys*  
23 *Acta* 1734: 91–111.
- 24 51. Ode PJ (2006) Plant chemistry and natural enemy fitness: effects on herbivore and natural enemy  
25 interactions. *Annu Rev Entomol* 51: 163–185.

- 1 52. Wei J, Wang L, Zhu J, Zhang S, Nandi OI, et al. (2007) Plants Attract Parasitic Wasps to Defend  
2 Themselves against Insect Pests by Releasing Hexenol. PLoS One 2: e852+.
- 3 53. Van Nouhuys S, Singer MC, Nieminen M (2003) Spatial and temporal patterns of caterpillar perfor-  
4 mance and the suitability of two host plant species. Ecol Entomol 28: 193–202.
- 5 54. Singer MS, Farkas TE, Skorik CM, Mooney K a (2012) Tritrophic interactions at a community level:  
6 effects of host plant species quality on bird predation of caterpillars. Am Nat 179: 363–374.
- 7 55. Flores CO, Meyer JR, Valverde S, Farr L, Weitz JS (2011) Statistical structure of host-phage interac-  
8 tions. Proc Natl Acad Sci U S A 108: E288–E297.
